# Supplementary material
Source: ML conference proceedings conference paper supplement (https://openreview.net/forum?id=sWzgZUmJich)
Supplement: supplementary_material [file attachment]

---

# SymNet 3.0: Exploiting Long-Range Influences in Learning Generalized Neural Policies for Relational MDPs

---

Vishal Sharma\*<sup>1</sup>

Daman Arora\*<sup>1</sup>

Mausam<sup>1</sup>

Parag Singla<sup>1</sup>

<sup>1</sup>Indian Institute of Technology Delhi {vishal.sharma, cs5180404, mausam, parags}@cse.iitd.ac.in

## Abstract

We focus on the learning of generalized neural policies for Relational Markov Decision Processes (RMDPs) expressed in RDDDL. Recent work first converts the instances of a relational domain into an *instance graph*, and then trains a Graph Attention Network (GAT) of fixed depth with parameters shared across instances to learn a state representation, which can be decoded to get the policy [Sharma et al., 2022]. Unfortunately, this approach struggles to learn policies that exploit long-range dependencies – a fact we formally prove in this paper. As a remedy, we first construct a novel *influence graph* characterized by edges capturing one-step influence (dependence) between nodes based on the transition model. We then define *influence distance* between two nodes as the shortest path between them in this graph – a feature we exploit to represent long-range dependencies. We show that our architecture, referred to as *Symbolic Influence Network* (SYMNET3.0), with its distance-based features, does not suffer from the representational issues faced by earlier approaches. Extensive experimentation demonstrates that we are competitive with existing baselines on 12 standard IPPC domains, and perform significantly better on six additional domains (including IPPC variants), designed to test a model’s capability in capturing long-range dependencies. Further analysis shows that SYMNET3.0 automatically learns to focus on nodes that have key information for representing policies that capture long-range dependencies.

## 1 INTRODUCTION

Recent work has shown the successful application of neural models for the task of automated planning [Hafner et al., 2018, Groshev et al., 2018]. Of particular interest are relational domains – which are characterized by objects, predicates, and a first-order transition model. These are typically represented in the form of a Relational Markov Decision Process (RMDP) [Boutilier et al., 2001], where grounding an RMDP with a set of objects results in a specific problem instance. A state is represented by an assignment to the groundings of predicates, referred to as state variables. Multiple different languages have been proposed to represent RMDPs, the popular ones being Relational Dynamic Influence Diagram Language [Sanner, 2010] (RDDDL) and Probabilistic Planning Domain Definition Language [Younes et al., 2005] (PPDDL), with our focus in this work being the former <sup>1</sup>. Given an RMDP expressed in RDDDL, the goal then is to learn a single generalized policy that is applicable to any instance of the domain. Recent works [Garg et al., 2019, 2020, Sharma et al., 2022] have made progress in this direction, showing that it is possible to train a neural model on smaller instances, which generalizes to (unseen) instances from the same domain.

Existing approaches convert a given instance into an *instance graph* where nodes represent object tuples <sup>2</sup>, and edges represent influence based on the transition model <sup>3</sup>. A Graph Attention Network (GAT) is used to compute node embeddings in this graph, and the state embedding is typically computed as a combination of node embeddings along with an aggregation function such as maxpool applied over them. A decoder network takes the state representation and gives a distribution over actions in the current state, resulting in a policy. Though this approach has met with initial success, some important problems remain. The key one that

---

\*Equal Contribution

<sup>1</sup>other approaches using PPDDL are discussed in related work

<sup>2</sup>a tuple of objects appearing as argument of some predicate

<sup>3</sup>additional nodes and edges are created representing singleton objects and their connections to object tuples that they are part of

we tackle in this paper is that of capturing long-range dependencies. For instance, consider the problem of navigating in a large grid where the objective is to reach a cell designated as the goal starting from the current location of the agent. Assume that each non-goal (non-agent) cell has an identical set of features, and the node embeddings are learned using a GAT with  $d$  layers. Then, consider the goal being in the middle of the grid, and two different states  $s_1$  and  $s_2$ , such that robot is to the left of the goal in  $s_1$  and to the right in  $s_2$  at a distance  $2d + 1$ . Then, ignoring any edge effects, the score for any given action (say 'left') will be identical in the two states. This is because any node in the network has view either of the robot or the goal, but not both. Further, one can establish a one-to-one mapping between the node embeddings in the resulting states, hence taking any aggregate function which is permutation invariant will result in identical state embeddings. Since the optimal actions in  $s_1$  and  $s_2$  are different, i.e., left and right respectively, there is no way for the model to learn the optimal policy in this case. We formally prove this deficiency for existing architectures. Increasing GAT depth  $d$  is not a solution either, due to blow-up in the number of parameters and other learnability issues with long-distance message passing [Li et al., 2018, Wu et al., 2020, Alon and Yahav, 2021].

As a remedy, we propose constructing a novel graph, referred to as the *influence graph*, whose nodes represent state variables, and two nodes are connected by an edge if they can influence each other in one step, based on the transition model. Intuitively, the distance between two nodes in the influence graph represents the minimum number of steps it would take for the influence of one node to reach the other via the transition dynamics of the model. The pairwise distances thus computed in the influence graph can be useful features for capturing long-range dependencies. We show that the addition of these distance-based features gives the model the representational power to capture long-range dependencies for a large class of problems. Our architecture referred to as *Symbolic Influence Network* (SYMNET3.0)<sup>4</sup>, builds on Sharma et al. 2022, and adds distance-based features at every node in the instance graph to capture the long-range dependencies. A multi-head attention is used for learning to focus on relevant nodes based on these features resulting in a distance-aware state representation, enabling our model to capture long-range dependencies. The resulting state is then decoded to get the policy as before.

Similar to earlier works [Garg et al., 2020, Sharma et al., 2022], we operate in the offline planning setting and train SYMNET3.0 by imitation learning using the data generated from an online planner PROST [Keller and Eyerich, 2012]. Our extensive experimental evaluation shows that (a) we are competitive with existing baselines on 12 IPPC domains which do not necessarily require capturing long-

range dependencies for learning the optimal policy, and (b) we are significantly better on 6 new domains (4 of them being IPPC variants) specifically designed to test the efficacy of the models when long-range dependencies need to be exploited for learning a good policy. Specifically, in the latter case, SYMNET3.0 performs better than its closest competitor SYMNET2.0 in all domains with a gain of 18% relative performance in the aggregate metric. Further analysis reveals that the influence-layer of SYMNET3.0 learns to focus attention on key nodes in the network central to capture the long-term dependencies.

## 2 BACKGROUND

### 2.1 RELATIONAL MARKOV DECISION PROCESSES USING RDDDL

Relational Dynamic influence Diagram Language [Sanner, 2010] (RDDDL) defines a first-order Relational Markov Decision Process (RMDP) in two parts, 1) a domain description that represents the object types ( $C$ ), state-fluent predicates ( $SF$ ), non-fluent predicates ( $NF$ ), action predicates ( $A$ ), first-order transition functions ( $T$ ) and first-order reward functions ( $R$ ); and 2) an instance description that represents a specific instance of the domain by describing its ground objects ( $O$ ), initial state ( $s_0$ ), discount factor ( $\gamma$ ) and horizon ( $H$ ). State-fluents are predicates that can change over time, whereas, non-fluents are predicates whose values are fixed for a given instance but can vary from instance to instance. Together they form the set of state predicates ( $SP$ ). Grounding a predicate implies replacing each argument of the predicate with an object-tuple having type-consistent objects. Grounding state predicates forms a set of state-variables ( $SP_O$ ), and grounding action predicates forms the set of ground actions ( $A_O$ ). A state is defined as an assignment to all state-variables, denoted by  $s \in \mathcal{PS}(SP_O)$ , where  $\mathcal{PS}$  is the power set. We denote the set of object tuples appearing in state-fluents as  $O_{SF}$ . The set of object tuples for which either a numeric non-fluent is defined or a true boolean non-fluent is defined is denoted as  $O_{NF}$ . Let  $Ar$  denote the maximum arity of any Predicate in  $SP$ . Throughout the paper, we denote any (state-fluent or non-fluent) ground predicate  $P(u_1, \dots, u_k)$  as  $P(\langle u \rangle)$  where  $\langle u \rangle = \langle u_1, \dots, u_k \rangle$  is an object tuple.

Each instance has an underlying Dynamic Bayesian Network (DBN) capturing its transition dynamics, which is a bipartite graph with (i) a set of nodes for each state-variable and each ground action at time  $t$  and (ii) a set of nodes for each state-variable at time  $t + 1$  and a reward node. There exists an edge from a node in the first node-set (i.e., at time  $t$ ) to a node in the second node-set (i.e., at time  $t + 1$ ) if the value of the former affects the value of the later [Mausam and Kolobov, 2012].

A sequence of works [Bajpai et al., 2018, Garg et al., 2019,

<sup>4</sup>The code for SYMNET3.0 and the RDDDL instance generators can be found at <https://github.com/dair-iitd/symnet3>

2020, Sharma et al., 2022] learns generalized neural policies for RDDDL RMDPs. All these works have their limitations: Torpido [Bajpai et al., 2018] can not transfer across instance size, TrapsNet [Garg et al., 2019] only handles domains with limited state and action predicate arities, and SymNet [Garg et al., 2020] ignores most non-fluents leading to generalization limitations. We build on the most recent of these, SYMNET2.0 [Sharma et al., 2022], that improves on SymNet (described in the next section).

## 2.2 SYMNET2.0

**Instance-Graph(s):** SYMNET2.0 converts a given instance into a set of graphs each referred to as an instance-graph, each having two types of nodes, (i) singleton object nodes: for each object  $o \in \mathcal{O}$ , a node  $o$  is added to all graphs. (ii) object-tuple nodes: for each unique object-tuple, i.e., for each  $\langle u \rangle \in \mathcal{O}_{SF} \cup \mathcal{O}_{NF}$ , a node  $\langle u \rangle$  is added to all graphs. We will use  $n$  to denote a node corresponding to either an object or an object-tuple. There are three types of graphs that capture different types of interactions among state-variables via edges that are created as follows,

1. DBN-based graph ( $G_d$ ): An edge is added between nodes  $\langle u \rangle$  and  $\langle v \rangle$  if there is a state-fluent  $P(\langle u \rangle)$  that affects another state-fluent  $Q(\langle v \rangle)$ .
2. Action-based graphs ( $\{G_{a1}, \dots, G_{a|A|}\}$ ): An edge is added to graph  $G_{ai}$  between nodes  $\langle u \rangle$  and  $\langle v \rangle$  if there is a state-fluent  $P(\langle u \rangle)$  that affects another state-fluent  $Q(\langle v \rangle)$  via action  $ai$ .
3. Position-based graphs ( $\{G_{p1}, \dots, G_{p|Ar|}\}$ ): A bidirectional edge is added between a singleton object node  $o$  and an object tuple node  $\langle u \rangle$ , in the graph  $G_{pi}$ , if  $o$  comes at position  $i$  of object tuple  $\langle u \rangle$ .

**Node features:** SYMNET2.0 adds node features in each graph as (i) For each predicate  $P(\langle u \rangle) \in SF \cup NF$ , a feature is added to node  $\langle u \rangle$ . (ii) For each unparameterized predicate  $Q \in SF \cup NF$ , a feature is added to all nodes. (iii) For each node, a one-hot encoding representing the type of the node is added. For object-tuple  $\langle u \rangle = \langle u_1, \dots, u_k \rangle$ ,  $type(\langle u \rangle) = (type(u_1), \dots, type(u_k))$ . The values for features corresponding to  $SF$  and  $NF$  come from the current state and the RDDDL descriptions, respectively.

**Node Embeddings:** Next, SYMNET2.0 computes node embeddings for each of these graphs by using a Graph Attention Network (GAT) [Veličković et al., 2018]. Each graph is passed through an independent GAT with fixed neighborhood size. The node embeddings from each graph are then merged into a single node embedding as  $\forall v \in V, ne(v) = concat(ne_{G_d}[v], \dots, ne_{G_{p|Ar|}}[v])$ , where  $V$  is the set of all nodes. To capture the complete state, a global embedding is also computed as  $ge = maxpool_{v \in V}(ne[v])$ . The set of node embeddings, along with the global embeddings, represent the state-representation.

Next, a set of action decoders is created for each action type, denoted by  $\{AD_1, \dots, AD_{|A|}\}$ . For a global action  $ac$  and for a ground action  $ac(\langle o \rangle)$ , where  $o = (o_1, \dots, o_k)$ , that affects a set of state-variables  $\mathcal{P}_{a(\langle o \rangle)}$ , the score is given as,

$$score(a(o)) = AD_{type(a)}(ne[o_1], \dots, ne[o_k], ge, maxpool_{P \in \mathcal{P}_{a(\langle o \rangle)}}(ne[args(P)])) \quad (1)$$

$$score(ac) = AD_{type(ac)}(ge) \quad (2)$$

Here,  $args(P)$  returns the arguments of predicate  $P$ . The scores of all actions are then normalized to get a policy. For training, imitation learning is used where the data is generated using the state-of-the-art online planner PROST [Keller and Eyerich, 2012].

## 3 TECHNICAL CONTRIBUTIONS

The organization of this section is as follows. We first highlight the deficiencies of SYMNET2.0 in representing long-range dependencies. We then present the architecture for SYMNET3.0 which addresses these limitations by incorporating the notion of distance-based features.

### 3.1 LIMITATIONS OF SYMNET2.0

We note that SYMNET2.0 uses fixed depth GAT, each node can only access information in its immediate neighborhood and ignores the information beyond its field of view. The only way to have information access beyond the field of view is through global embedding. However, SYMNET2.0’s max pool-based global embedding is a commutative operation that ignores the structure of the graph. Hence, if we swap node embeddings of any two nodes, SYMNET2.0 will not be able to identify this change leading to sub-optimal policies. Next, we will explain this formally.

**Theorem 1.** *Let  $G$  be an instance graph with two nodes  $n_1$  and  $n_2$  representing object-tuples of state-variables, having identical  $2d$  hop neighborhoods. Let  $s_1$  be some state where  $n_1$  and  $n_2$  are distinct nodes having node features  $f_1$  and  $f_2$ , respectively, such that  $f_1 \neq f_2$ . Let  $s_2$  be another state where the node features of  $n_1$  and  $n_2$  are swapped with each other, and the remaining node features are same as in  $s_1$ . Let the state-representation (set of node embeddings and maxpool global embedding) be computed by using a GAT of fixed-depth  $d$ . Then, the state-representations of  $s_1$  and  $s_2$  will be the same and we refer to  $s_1$  and  $s_2$  as symmetric states with respect to nodes  $n_1$  and  $n_2$ .*

*Proof (Sketch).* Only the nodes in the  $d$  hop neighborhood of  $n_1$  and  $n_2$  notice the swap, and as their neighborhoods are identical, there is a one-to-one correspondence between node embeddings before and after the swap. Node embeddings of all nodes outside the  $d$  hop neighborhood of  $n_1$

and  $n_2$  will be unchanged. Next, a commutative function like maxpool will return the same value before and after the swap. Hence the set of node-embeddings and global embedding that formulate the state-representations remains unchanged.  $\square$

**Theorem 2.** *In reference to Theorem 1, let there be two singleton nodes  $o_i$  and  $o'_i$  whose features have been swapped in symmetric states  $s_1, s_2$ . Let  $ac_1 = A_C(o_1, \dots, o_i, \dots, o_k)$  be an action applicable in  $s_1$  and  $ac_2 = A_C(o_1, \dots, o'_i, \dots, o_k)$  be an action applicable in  $s_2$ , that differ only in the arguments  $o_i$  and  $o'_i$ . Further, if  $\mathcal{P}_{ac_1} \setminus \{o_i\} = \mathcal{P}_{ac_2} \setminus \{o'_i\}$ , then, the action score assigned by SYMNET2.0 to  $ac_1$  and  $ac_2$  will be the same.*

*Proof (Sketch).* As node-embeddings of  $o_i$  and  $o'_i$  are the same, the action scores for  $ac_1$  and  $ac_2$  will be the same.  $\square$

**Corollary 1.** *The action score assigned by SYMNET2.0 to any global action is the same in both  $s_1$  and  $s_2$ .*

*Proof (Sketch).* The score for a global action (Eqn. 2) is a function of only  $ge$ , and as from Theorem 1  $ge$  is the same for  $s_1$  and  $s_2$ ; hence the score will remain the same.  $\square$

Theorem 1 and Corollary 1 imply that, when all actions are unparameterized, SYMNET2.0 can not represent policies that need to differently treat states  $s_1$  and  $s_2$  that are identical to each other, except for the features of  $n_1$  and  $n_2$  being swapped with each other in  $s_1$  and  $s_2$ .

**Example:** Consider the deterministic Navigation domain where a robot has to locate a goal in a 2D-grid (say  $23 \times 23$ ) with no obstacles. Let the Boolean predicate `robot_at(x, y)` denote whether the robot is at location  $(x, y)$  or not (See supplement for the RDDL domain description). Let us assume SYMNET2.0 uses GATs with depth 2. Let the goal be at location  $l_g = (10, 10)$ . Consider a state  $s_1$  that has the robot at location  $l_1 = (5, 10)$  and another state  $s_2$  where the robot is at location  $l_2 = (15, 10)$ . In either of these states, no node in the network has a view of both the goal and the agent location. Further, it is easy to see due to symmetry, there is one to one correspondence between node embeddings in  $s_1$  to the node embeddings in  $s_2$ , resulting in identical global embeddings computed via maxpool. The above theorems state that SYMNET2.0 considers both  $s_1$  and  $s_2$  as the same and hence, results in decoding of the identical action in both these states. In other words, it has no way to represent the optimal policy, which corresponds to taking 'move right' action in  $s_1$  and 'move left' action in  $s_2$ .

### 3.2 SYMNET3.0: INCORPORATING INFLUENCE

We next present our model Symbolic Influence Network (SYMNET3.0), which addresses some of the issues faced by

SYMNET2.0. Intuitively, SYMNET2.0 fails to represent certain desirable policies since its view is limited by the depth of the underlying GAT. Two nodes that are more than  $2d$  distance away, with  $d$  being the depth of GAT, do not share any neighborhood and hence, have no way to propagate relevant information to each other. Further, maxpool being a permutation invariant operation has no way to capture the relative ordering of nodes in the network. A combination of these issues results in the learning of sub-optimal policies. A natural way to address this would be to simply increase the depth of the GAT. But unfortunately, this leads to blow-up in the number of parameters, potentially causing overfitting. Another approach would be to consider a GAT with parameters tied across layers [Palm et al., 2018] but that still requires passing messages for a long distance, potentially resulting in learnability issues as observed by Zambetta and Thangarajah [2022].

Motivated by these shortcomings, we take a different approach and ask the following question: "Since we have full knowledge of the transition model, is there a way to apriori encode some information in the network which would break the symmetry of states which should actually be different from each other?" Presumably doing so would also help us in learning policies which can discriminate between such similar looking states based on a fixed depth GAT. One way to encode such information would be to capture the distance between two nodes in a graph, where the nodes represent state variables (predicates), and edges represent transitions from one state variable to another, via an action. We note that this may not be possible to do it on the original instance graph, due to presence of a larger number of additional nodes (e.g., singletons) making it too dense, and unsuitable for capturing such a notion of distance.

In the navigation example, this kind of graph would capture the underlying grid structure, since robot can move in either direction in one step via the transition model. This means that if the model is given access to this distance information as a feature, it could represent policies not earlier representable by SYMNET2.0, e.g., in our navigation domain, it is better to move in the direction, which minimizes the distance to the goal. In general, some other complicated function of the distance could also be learned, as we show in our experiments. Next, we formally introduce the notion of influence distance followed by changes to the SYMNET2.0 architecture to exploit the distance-based features.

#### 3.2.1 Influence Graph and Influence Distance

To succinctly represent the influence among state-variables of a given instance  $I$ , we define an *influence graph*  $I_G$  as follows: (a) There is a node for each state-variable  $P(\langle u \rangle)$  in  $I_G$ , and (b) There is a directed edge  $(P(\langle u \rangle), Q(\langle v \rangle))$  if state-variable  $P(\langle u \rangle)$  affects the state-variable  $Q(\langle v \rangle)$  in the following time step based on the transition model in the

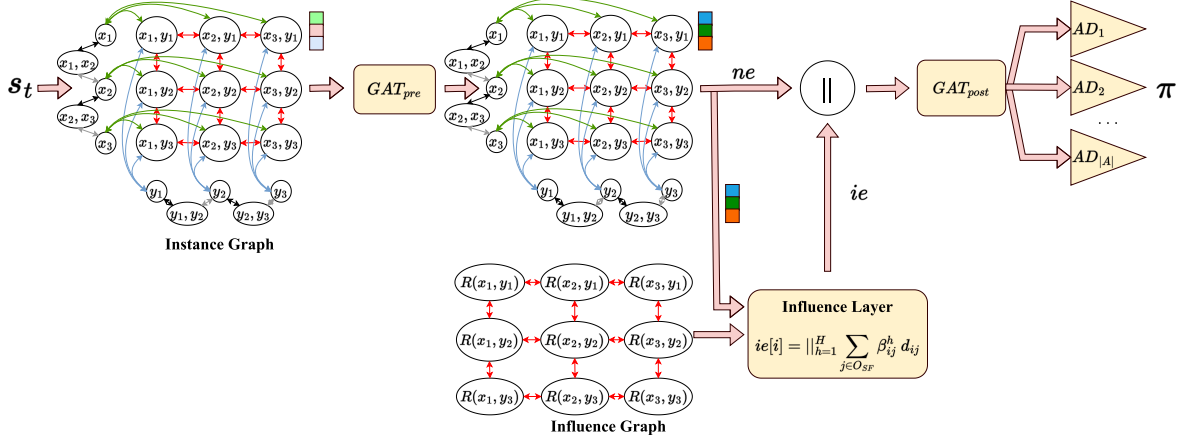

Figure 1: Figure shows the three-step process of SYMNET3.0 for policy prediction. The instance graph and influence graph are representative of the Navigation domain (See supplement for domain description). The instance graph has nodes for object-tuples  $((x_i, x_j), (y_i, y_j), (x_i, y_j), x_i, y_i)$  and the influence graph has nodes for predicates  $(R(x_i, y_j))$  denoting the robot\_at predicate). In the case of SYMNET2.0, only instance-graph is present.

DBN. Intuitively, the influence graph removes the notion of time from the *nodes* present in the DBN and captures dependencies among the state-variables. In the Navigation domain, it will have nodes for robot\_at state-variables and edges for each neighboring cell (see Fig 1)

**Definition 1.** Given an Influence Graph  $I_G$ , we define influence distance between two nodes  $n_1, n_2 \in I_G$ , as the length of the shortest path from  $n_1$  to  $n_2$  in  $I_G$ .

Note that a distance of  $k$  between nodes  $P(\langle u \rangle)$  and  $Q(\langle v \rangle)$  implies that it takes at least  $k$  time steps for state-variable  $P(\langle u \rangle)$  to influence state-variable  $Q(\langle v \rangle)$ . Since the influence distance is computed in the influence graph, which is based on the transition model, in general, it will be the distance between two nodes in a directed graph. Next, we describe how this influence distance is incorporated in the SYMNET3.0 architecture to learn the desirable policies.

### 3.2.2 SYMNET3.0 Architecture

We use the same instance graph as used in SYMNET2.0 i.e., it has the same set of nodes, edges, and input features, modulo one important distinction. As SYMNET2.0 has multiple adjacencies in its instance graph, on large instances, the memory requirements become too high, leading to an out-of-memory error. As a simple remedy, we use a single adjacency (in both SYMNET2.0 and SYMNET3.0), but with edge-types where each edge-type represents the original adjacency it comes from. Therefore, there will be  $1+|A|+|Ar|$  edge types corresponding to all the original instance graphs.

To compute node-embeddings in SYMNET3.0, we use a three-step process (Figure 1), (i) Compute initial node-embeddings using a fixed-depth pre-process GAT, (ii) compute influence distance among nodes and incorporate it

as a feature in instance graph, and (iii) combine initial node-embeddings and distance feature to get final node-embeddings using a fixed-depth post-process GAT. We provide the details below.

**Pre-Processing:** The information about an object-tuple is provided either as state fluents or non-fluents or both. In the instance graph, the non-fluent based nodes are connected to singleton nodes which are in turn connected to the state fluent based nodes; hence to collate the information on the state variable nodes, we need an initial message-passing step. To compute the initial node-embeddings ( $ne$ ), we use a single Graph Attention Network [Veličković et al., 2018] called pre-process GAT ( $GAT_{pre}$ ) that can incorporate edge types as,

$$\alpha_{ij}^h = \text{softmax}_{\mathcal{N}_i} (LRelu(a^T [W_1^h f_i || W_1^h f_j || W_2^h e_{ij}]))$$

$$ne[i] = ||_{h=1}^H \sum_{j \in \mathcal{N}_i} \alpha_{ij}^h W_3^h f_j \quad (3)$$

Here,  $f_i$  and  $\mathcal{N}_i$  denote the features and one-hop neighbours of node  $i$ .  $e_{ij}$  is the one-hot encoding of each edge type.  $H$  and  $||$  denote the number of attention heads and concatenation operators, respectively. In our experiments, we use  $GAT_{pre}$  of depth 2 as this is the minimum number of message passing steps required for information from non-fluent nodes to reach the state fluent nodes.

**Incorporating Influence:** Since the influence-distance is defined over state-variables, whereas each node in the instance graph is either an object or an object-tuple, we have to first define a mapping from the influence-distance to nodes of instance graph, which is followed by computation of distance feature based *influence-embeddings* (see below).

1. For two nodes  $i, j \in O_{SF}$  in the instance graph, we define  $d_{ij}$  as the minimum influence distance between any two

state-variables mapped to these nodes. We normalize  $d_{ij}$  by dividing it by the maximum value of  $d_{ij}$  for that instance. Note that computation of  $d_{ij}$  is a static process, done once for each instance. Then, we introduce a novel layer called *influence-layer*, with the goal of capturing the notion of the distance of each node from other nodes (like the goal node in the navigation domain). Since we do not know which nodes are relevant, we use an attention mechanism to figure this out. The influence-embeddings ( $ie$ ) are thus computed as,  $\forall i, j \in O_{SF}$

$$\beta_{ij}^h = \text{softmax}_{O_{SF}}(L\text{Relu}(a^T [U_1^h ne[i] || U_1^h ne[j] || U_2^h d_{ij}]))$$

$$\forall i \in O_{SF}, ie[i] = \sum_{j \in O_{SF}} \beta_{ij}^h d_{ij} \quad (4)$$

2. For any other remaining node  $k$  in the instance graph,  $ie[k] = \sum_{h=1}^H 0$ .

Intuitively, in equation block 4, each state-variable object-tuple node  $i$  assigns a weight  $\beta_{ij}^h$  based on the information on  $i$  and  $j$ , and how far away they are in the influence space. Further, to diversify the long-range information localization, we encourage our attention heads to assign different weights to different nodes. For this, during training, we add a loss term that maximizes the KL divergence between attention scores ( $\beta_{ij}^h$ ) of any two random attention heads of a randomly sampled node  $i \in O_{SF}$ .

**State-Representation:** We update the node-embeddings using influence-embeddings and a post-process GAT as,  $ne[i] = GAT_{post}(ne[i] || ie[i])$  and compute a global embedding as  $ge = \text{maxpool}_{i \in V} ne[i]$ . The use of distance features provides nodes in SYMNET3.0 with the capability to focus on some key nodes and learn node-embeddings that break the symmetry induced by fixed-depth GAT as in SYMNET2.0.

**Action Decoding:** Similar to SYMNET2.0, we compute action scores using a set of action decoders  $\{AD_1, \dots, AD_{|A|}\}$ , and take softmax over all scores to get the policy.

### 3.3 REPRESENTABILITY

**Theorem 3.** SYMNET3.0 can represent all policies that SYMNET2.0 can represent.

*Proof (Sketch).* SYMNET3.0 subsumes SYMNET2.0 as each node can write an 0 vector as its influence-embedding, rendering the weights that process  $ie$  inactive, thus reducing SYMNET3.0 to SYMNET2.0.  $\square$

**Theorem 4.** For a node  $n$  in the influence graph, let  $L(n, k)$  denote the multi-set of node features of nodes that are exactly  $k$  hops away from node  $n$  in the influence graph. In reference to theorem 1, given the features of nodes  $n_1$  and  $n_2$ , if there exists a  $k > 0$  such that  $L(n_1, k) \neq L(n_2, k)$ ,

then, given a sufficiently powerful attention function SYMNET3.0 has the power to learn the parameters that break the symmetry induced between  $s_1$  and  $s_2$  which have the features of nodes  $n_1$  and  $n_2$  swapped. [see Supplement for a proof sketch]

**Theorem 5.** In reference to Theorem 4, let there be two singleton nodes  $o_i$  and  $o'_i$  whose features have been swapped in states  $s_1$  and  $s_2$ , making these states symmetric to each other with respect to  $o_i$  and  $o'_i$ . Let  $ac_1 = A_C(o_1, \dots, o_i, \dots, o_k)$  be an action applicable in  $s_1$  and  $ac_2 = A_C(o_1, \dots, o'_i, \dots, o_k)$  be an action applicable in  $s_2$ , that differ only in the arguments  $o_i$  and  $o'_i$ . Further, if  $\mathcal{P}_{ac_1} \setminus \{o_i\} = \mathcal{P}_{ac_2} \setminus \{o'_i\}$ , then, SYMNET3.0 has the power to assign different action scores to  $ac_1$  and  $ac_2$ .

*Proof (Sketch).* From theorem 4 SYMNET3.0 can learn different node-embeddings of  $o_i$  and  $o'_i$  thus having the power to give different action scores for  $ac_1$  and  $ac_2$ .  $\square$

## 4 EXPERIMENTS

We design our experiments for answering three research questions. (i) How well does SYMNET3.0 handle the long-range influence problem in comparison to SYMNET2.0? (ii) How do these models compare on domains that do not have long-range dependences? (iii) Can we identify SYMNET3.0's strengths and limitations?

### 4.1 EXPERIMENTAL SETUP

Previous works [Garg et al., 2020, Sharma et al., 2022] have experimented with twelve IPPC 2011 and 2014 domains. Our preliminary analyses indicated that most of those domains do not require solving the long-range dependence problem: either the instances are too small, or policies are too localized. So, we use these domains to answer question (ii) above. We additionally create six new domains, which we name as LR domains, that necessitate recognizing the long-range influences for computing good solutions.

**Domains:** We now briefly describe the new LR domains (see supplement for further details on all domains),

1) **Deterministic Navigation (DNav):** A robot in a 2D-grid has to reach a far away goal cell in a minimum number of steps. A reward of -1 is given at every time step and 0 on reaching the goal.

2) **Stochastic Corridor Navigation (StNav):** This is a variant of IPPC's Navigation domain. Given a 2D grid, a robot has to reach a goal location, but it can die with a certain probability at each cell, except the bottom and the topmost rows are safe. The robot and goal locations are sampled randomly in the bottom and top rows, respectively. There is a single randomly sampled safe vertical corridor from bottom to top. The IPPC Navigation is a special case of

| Model                   | SRecon      | Pizza       | DNav        | StWall      | EAcad       | StNav       | Mean        |
|-------------------------|-------------|-------------|-------------|-------------|-------------|-------------|-------------|
| PROST                   | 0.34        | 0.09        | 0.94        | 0.69        | 0.37        | 0           | 0.41        |
| SYMNET2                 | 0.47        | 0.26        | 0.55        | 0.27        | 0.9         | 0.03        | 0.41        |
| SYMNET3-KL              | <b>0.68</b> | <b>0.62</b> | 0.84        | 0.33        | 0.87        | 0.08        | 0.57        |
| SYMNET3+KL <sub>D</sub> | 0.62        | 0.58        | 0.91        | <b>0.38</b> | <b>0.92</b> | <b>0.15</b> | <b>0.59</b> |
| SYMNET3+KL              | 0.61        | 0.18        | <b>0.95</b> | 0.35        | 0.91        | 0.05        | 0.51        |

Table 1: Comparison of SYMNET3.0 with the baselines on 6 LR domains (bold denotes the best-performing neural model)

| Model                   | Tam         | Traffic     | Sys         | Skill       | Nav         | TT          | Recon       | Elev        | Acad        | CT          | GoL         | Wild        | Mean        |
|-------------------------|-------------|-------------|-------------|-------------|-------------|-------------|-------------|-------------|-------------|-------------|-------------|-------------|-------------|
| PROST                   | 0.86        | 0.91        | 0.76        | 0.84        | 0.00        | 0.03        | 0.59        | 0.91        | 0.64        | 0.34        | 0.32        | 0.57        | 0.56        |
| SYMNET2                 | 0.90        | <b>0.88</b> | 0.79        | <b>0.82</b> | 0.54        | <b>0.78</b> | 0.35        | <b>0.92</b> | <b>0.83</b> | <b>0.81</b> | 0.62        | 0.78        | <b>0.75</b> |
| SYMNET3-KL              | <b>0.91</b> | 0.85        | 0.81        | 0.81        | 0.53        | 0.70        | <b>0.42</b> | 0.87        | 0.73        | 0.8         | <b>0.76</b> | <b>0.79</b> | <b>0.75</b> |
| SYMNET3+KL <sub>D</sub> | 0.90        | 0.85        | <b>0.83</b> | 0.77        | <b>0.85</b> | 0.67        | 0.29        | 0.71        | 0.78        | 0.78        | 0.61        | 0.77        | 0.73        |
| SYMNET3+KL              | 0.90        | 0.85        | 0.82        | 0.70        | 0.71        | 0.74        | 0.24        | 0.91        | 0.80        | 0.80        | 0.41        | 0.18        | 0.67        |

Table 2: Comparison of SYMNET3.0 with the baselines on 12 IPPC domains (bold denotes best-performing neural model)

StNav where the safe corridor is always the first column.

3) **Extreme Academic Advising (EAcad)**: A variant of IPPC’s Acad, EAcad has a set of courses arranged in a directed acyclic graph with some courses as program requirements that the agent has to complete in order to complete the degree. The probability of completing a course without completing all its pre-requisites is very low. Therefore, in the optimal policy, a course should be taken only if it is an ancestor of some far-away program requirement.

4) **Safe Recon (SRecon)**: In this modification of IPPC’s Recon, there is 2D-grid with multiple objects, and the robot has to locate an object to apply a tool to get a reward. The action may damage the object, so it may need to locate and try on the next object.

5) **Pizza Delivery (Pizza)**: This is a new domain, in which a robot in a 2D-grid has to pick pizza from one of the outlets and deliver it to a customer in the shortest time in a windy (stochastic) environment. The robot should choose an outlet that minimizes the total distance, rather than going to the closest one.

6) **Stochastic Wall (StWall)**: Another new domain, where a robot has to reach a goal location in a 2D grid, where the grid contains either a horizontal or a vertical wall. Each cell in the wall has a high death probability except for one randomly selected safe passage in between. An agent has to locate the safe passage in the wall and reach the goal.

**Training Details**: In the spirit of domain-independent generalized planning, we use a single architecture (with fixed hyperparameter setting) on all domains, and the validation set is used only for early stopping. For each LR domain, we generate 1000 training, 100 validation, and 200 test instances with size (#state-fluents) increasing from train to validation to test instances. And for standard IPPC domains, we

generate 200 training, 10 validation, and 40 test instances.<sup>5</sup> See the supplement for details on the instance sizes.

Similar to SYMNET2.0, we use state-of-the-art online planner PROST and generate 30 trajectories for each training instance, and train using imitation learning on the first 300 transitions. As PROST is a sampling-based solver, it can end up taking different actions for the same state; we remove this ambiguity by choosing the most frequent action for each state. We train for 48 hours for each of the 6 new domains and for 24 hours each on the 12 IPPC domains. Each checkpoint is evaluated on validation instances, and we pick the one with the best average reward on the validation instances.

**Comparison Algorithms**: For SYMNET3.0,  $GAT_{pre}$  and  $GAT_{post}$  have depth 2 each, and there are 10 attention-heads in the influence-layer for all domains (supplement has further details). We use the loss function  $L_{imit} - \lambda L_{KL}$ , where  $L_{imit}$  and  $L_{KL}$  denote the imitation, KL-based loss and  $\lambda$  is a hyperparameter. We implement three variations: firstly SYMNET3.0-KL where  $\lambda = 0$ , and SYMNET3.0+KL where  $\lambda = 0.1$ . Our eventual goal is indeed to create *one* planner that can work for all domains. To this end, we develop a third variation, SYMNET3.0+KL<sub>D</sub> where we keep  $\lambda = 0.1$  for first 2000 training batches and then linearly decay  $\lambda$  from 1 to 0 in the next 1000 batches. We compare SYMNET3.0 with SYMNET2.0, the existing state-of-the-art model for this task. For fair comparison, we use a 4 depth GAT to match SYMNET3.0’s total depth. In addition we also report results of PROST in its default setting. We note that a direct comparison is not meaningful, as PROST uses interleaved planning and execution, whereas other models are offline planners.

As mentioned in Section 3, for both SYMNET2.0 and SYM-

<sup>5</sup>Code released at <https://github.com/dair-iitd/symnet3>

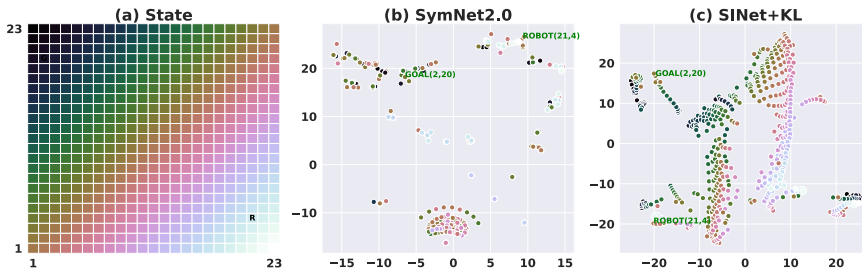

Figure 2: (a) Shows the color-coded locations of a  $23 \times 23$  instance of the DNav domain where R and G are the robot and goal. Fig. (b) and (c) show the 2D t-SNE plot for node embeddings of the grid locations for SYMNET2.0 and SYMNET3.0+KL.

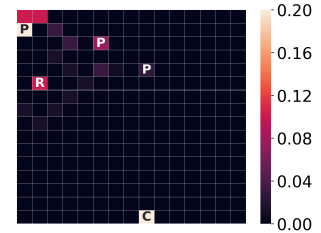

Figure 3: The attention map of the influence-layer in the Pizza domain for the R node.

NET3.0, we use edge-types in one instance-graph, rather than having multiple instance-graphs. This allows both models to avoid high memory requirement issues on larger instances. We tried the original SYMNET2.0 setting of multiple instance graphs, but it does not scale to large instances. We also tried dynamically varying the GAT depth proportional to the instance size in SYMNET2.0, but this also leads to training issues due to high computational requirements (as observed earlier [Zambetta and Thangarajah, 2022]).

**Evaluation metric:** Following SYMNET2.0, for a given domain, we calculate a relative performance score for a method  $m$  on an instance  $i$  as,  $\alpha(m, i) = \frac{V_m(i) - V_{rand}(i)}{V_{max}(i) - V_{rand}(i)} \in (-\infty, 1]$ , where  $V_m(i)$  and  $V_{rand}(i)$  denote method  $m$ 's and random policy's reward, respectively. And,  $V_{max}(i)$  denotes the best reward by any method on instance  $i$ . Here, a value of 0 marks the random policy score, and 1 implies the best performance across all methods on all runs. Next, we calculate  $\alpha(m) = \frac{1}{|I_{test}|} \sum_{i \in I_{test}} \alpha(m, i)$ , which is method  $m$ 's score averaged over all test instances ( $I_{test}$ ). Finally, we report  $\alpha(m)$  averaged over 5 independent runs.

## 5 RESULTS

Tables 1 and 2 show our results where each  $(i, j)^{th}$  entry gives the  $\alpha$  value of  $i^{th}$  model on the  $j^{th}$  domain. The bold numbers show the best-performing neural method. The results for PROST are in gray as it is not a direct comparison. The last column reports the average over all domains.

**Long Range Domains:** Table 1 shows that all variations of SYMNET3.0 outperform the improved baseline SYMNET2.0 on all 6 new LR domains on the mean aggregate metric with a margin of +10  $\alpha(m)$  points for SYMNET3.0+KL, +16 for SYMNET3.0-KL, and +18 for SYMNET3.0+KL<sub>D</sub>. Interestingly, SYMNET3.0+KL<sub>D</sub> outperforms SYMNET2.0 on all 6 LR domains. Interestingly, SYMNET3.0+KL<sub>D</sub> is able to achieve a score of +15 on StNav, where PROST and SYMNET2.0 fail to give any meaningful policy, highlighting the inherent difficulty of the domain. Similarly, for Pizza domain, PROST again fails to perform well, and both SYMNET3.0-KL and

SYMNET3.0+KL<sub>D</sub> get a score of greater than +55 as compared to SYMNET2.0's +26.

**IPPC Domains:** SYMNET3.0-KL performs at par with SYMNET2.0 on the IPPC domains. However, overall, SYMNET3.0+KL's performance drops in comparison to SYMNET2.0, specifically on Skill, GoL, and Wild domains. We hypothesize that as the training data increases, it should perform at par with SYMNET2.0 and we leave this analysis for future work.

**Use of KL divergence loss:** In general, we note that using KL-based loss improves performance in some domains. However, having a KL-based loss doesn't give better performance consistently across all domains. We hypothesize that this is because the KL loss enforces a strong inductive bias, where all attention heads must focus on different nodes in the graph. Hence, in the case of domains without long-range dependency, it could lead to attention on irrelevant nodes causing overfitting. We also observed in certain domains that sometimes the KL loss could lead to convergence problems during training. The investigation of this phenomenon is left for future work. The overall performance of unified model SYMNET3.0+KL<sub>D</sub> is best among all baselines for LR domains, and marginally lower than SYMNET2.0 for IPPC domains suggesting that the SYMNET3.0+KL<sub>D</sub> architecture is robust across multiple types of domains.

**Model selection based on validation reward:** Further, when we select the best among SYMNET3.0's variations based on the validation set, we notice that for both IPPC and LR settings, this model gives a slight boost in the overall performance in comparison to the earlier best model. Additionally, SYMNET3.0 marginally outperforms SYMNET2.0 in the IPPC setting (see Supplement for results).

### 5.1 INSIGHTS

**Visualizing node embeddings:** Figure 2 shows the node embeddings of the locations of a DNav instance of size  $23 \times 23$  as computed by SYMNET3.0+KL and SYMNET2.0. Each grid location is color-coded (Figure 2(a)) and is marked as a circle in Figure 2(b) and (c) where its 2-dimensional t-SNE



embedding is used as the circle’s location. SYMNET3.0’s node-embeddings retain the structure of a 2D grid. In comparison, SYMNET2.0 does not exhibit any such structure.

**Visualizing influence-layer:** Figure 3 shows an instance of the Pizza domain with 3 pizza outlets (P), one customer (C), and a robot (R). Figure 3 shows the attention map ( $\beta_{ij}$ ) of the influence-layer, averaged over all heads where  $i$  is the node with the robot (R). We observe that SYMNET3.0 automatically learns to assign a high attention score to the key nodes having information of Pizza outlets (P) and the customer (C). This provides deeper insight into the learned policy. Further, we observe that in this instance, the learned policy by our model is the one that takes the robot to the P, which minimizes the total distance to C. We observe similar qualitative behavior for other domains (see supplement).

## 6 RELATED WORK

**Generalized Planning:** Earlier works for learning generalized policies for relational planning focus on learning generalized features that can be transferred across instances [Fern et al., 2003, Guestrin et al., 2003, Mausam and Weld, 2003]. Recent works try to learn generalized policies using deep neural networks for both PPDDL [Toyer et al., 2018, Ståhlberg et al., 2022a,b] and RDDDL [Issakkimuthu et al., 2018, Garg et al., 2019, 2020, Sharma et al., 2022]. Ståhlberg et al. [2022a,b] argue that the policies that can not be written in two variable counting logic can not be represented using Graph Neural Networks. They also highlight the problem of long-range dependencies; however, they do not propose any solution. ASNet [Toyer et al., 2018] also focuses on PDDL (rather than RDDDL), and has a tight coupling with an online planner to learn generalized neural policies for PPDDL. PPDDL and RDDDL differ in their modeling choices; for example, PPDDL provides an explicit goal state definition, whereas RDDDL does not. Neural solvers for both of these depend heavily on these facts; for example, ASNet relies on the availability of a goal state. Further, automatically converting a domain from one to another would first require grounding the representation, losing the first-order semantics. Hence, it is difficult to have a direct comparison. Another work by Silver et al. [2021] learns to predict objects’ importance with the goal of pruning the number of objects. However, their target is to speed up planning rather than generalize and hence not directly comparable to ours.

To the best of our knowledge, work by Issakkimuthu et al. [2018] was the first to learn policies using neural networks for RDDDL RMDPs; however, they do not learn generalized policies. A sequence of works [Bajpai et al., 2018, Garg et al., 2019, 2020, Sharma et al., 2022] learns generalized neural policies for RDDDL RMDPs.

**General Graph Neural Network techniques:** Skip connections-based approaches like JK-net [Xu et al., 2018]

focus on improving the learnability when the depth of the GNN is increased but do not affect the representation problem of long-range dependence. Another approach is to use hierarchical GNNs based on Pooling approaches like Diff-pool [Ying et al., 2018] that stack blocks of message passing and pooling blocks. However, these approaches select and deselect nodes to be grouped together based on a learned score and hence alter the notion of distance among nodes – a notion critical in the planning problems. Moreover, to handle size transfer, an architecture with a varying number of message passing and pooling blocks are needed to handle large instances. Hence, for any fixed-sized hierarchical GNN, there is always a large enough instance such that the given network does not have the capacity to capture all the long-range dependencies.

## 7 CONCLUSION AND FUTURE WORK

We have studied the problem of capturing long-range dependencies in neural architectures for learning policies in RDDDL RMDPs. We have proposed SYMNET3.0, which defines the novel notion of influence graph defined over state variables, with edges representing transitions between them. The distance in the influence graph is incorporated as a feature in the instance graph, to represent long range dependencies, and the corresponding policies are learned using a multi-headed attention architecture. Extensive experimentation shows that our approach is competitive on 12 IPPC domains, and does significantly better on six domains designed to test long range dependencies, in comparison with SOTA baselines.

One of the limitations of our work is the dependence on an existing planner to generate training dataset for imitation learning. Integrating SYMNET3.0 with RL for learning generalised policies is a direction for future work. Another potential limitation is that we only consider pairwise distances between nodes - it may not capture policies which simultaneously depend on distances among a set of nodes; this is another direction for future work. Applying our approach to the PPDDL-based RMDPs is also a direction for future work.

### Acknowledgements

This work is supported by IBM AI Horizon Networks (AIHN) grant. Parag Singla is supported by IBM SUR awards. Mausam is supported by grants from Huawei, Google, Verisk, and a Jai Gupta Chair Fellowship. We thank the IIT Delhi HPC facility for computational resources. Any opinions, findings, conclusions or recommendations expressed in this paper are those of the authors and do not necessarily reflect the views or official policies, either expressed or implied, of the funding agencies.

## References

- Uri Alon and Eran Yahav. On the bottleneck of graph neural networks and its practical implications. In *International Conference on Learning Representations*, 2021. URL <https://openreview.net/forum?id=i800PhOCVH2>.
- Aniket Bajpai, Sankalp Garg, and Mausam. Transfer of deep reactive policies for MDP planning. In *Annual Conference on Neural Information Processing Systems (NeurIPS)*, pages 10988–10998, 2018.
- Craig Boutilier, Raymond Reiter, and Bob Price. Symbolic dynamic programming for first-order mdps. In *International Joint Conference on Artificial Intelligence (IJCAI)*, volume 1, pages 690–700, 2001.
- Alan Fern, Sungwook Yoon, and Robert Givan. Approximate policy iteration with a policy language bias. *Advances in neural information processing systems*, 16, 2003.
- Sankalp Garg, Aniket Bajpai, and Mausam. Size independent neural transfer for RDDDL planning. In *Proceedings of the International Conference on Automated Planning and Scheduling*, volume 29, pages 631–636, 2019.
- Sankalp Garg, Aniket Bajpai, and Mausam. Symbolic network: generalized neural policies for relational mdps. In *International Conference on Machine Learning*, pages 3397–3407, 2020.
- Edward Groshev, Aviv Tamar, Maxwell Goldstein, Siddharth Srivastava, and Pieter Abbeel. Learning generalized reactive policies using deep neural networks. In *2018 AAAI Spring Symposium Series*, 2018.
- Carlos Guestrin, Daphne Koller, Chris Gearhart, and Neal Kanodia. Generalizing plans to new environments in relational mdps. In *Proceedings of the 18th international joint conference on Artificial intelligence*, pages 1003–1010, 2003.
- Danijar Hafner, Timothy Lillicrap, Ian Fischer, Ruben Villegas, David Ha, Honglak Lee, and James Davidson. Learning latent dynamics for planning from pixels. *arXiv preprint arXiv:1811.04551*, 2018.
- Murugeswari Issakkimuthu, Alan Fern, and Prasad Tadepalli. Training deep reactive policies for probabilistic planning problems. In *Proceedings of the International Conference on Automated Planning and Scheduling*, volume 28, 2018.
- Thomas Keller and Patrick Eyerich. Prost: Probabilistic planning based on uct. In *Twenty-Second International Conference on Automated Planning and Scheduling*, 2012.
- Qimai Li, Zhichao Han, and Xiao-Ming Wu. Deeper insights into graph convolutional networks for semi-supervised learning. In *Proceedings of the Thirty-Second AAAI Conference on Artificial Intelligence and Thirtieth Innovative Applications of Artificial Intelligence Conference and Eighth AAAI Symposium on Educational Advances in Artificial Intelligence*. AAAI Press, 2018. ISBN 978-1-57735-800-8.
- Mausam and Andrey Kolobov. *Planning with Markov Decision Processes: An AI Perspective*. Synthesis Lectures on Artificial Intelligence and Machine Learning. Morgan & Claypool Publishers, 2012.
- Mausam and Daniel Weld. Solving relational MDPs with first-order machine learning. In *Proceedings of the Workshop on Planning under Uncertainty and Incomplete Information, at ICAPS*, 2003.
- Rasmus Palm, Ulrich Paquet, and Ole Winther. Recurrent relational networks. *Advances in neural information processing systems*, 31, 2018.
- Scott Sanner. Relational dynamic influence diagram language (rddl): Language description. *Unpublished ms. Australian National University*, 32:27, 2010.
- Vishal Sharma, Daman Arora, Florian Geißer, Mausam, and Parag Singla. Symnet 2.0: Effectively handling non-fluents and actions in generalized neural policies for rddl relational mdps. In *Proceedings of the Thirty-Eighth Conference on Uncertainty in Artificial Intelligence*, volume 180 of *Proceedings of Machine Learning Research*, pages 1771–1781. PMLR, 01–05 Aug 2022. URL <https://proceedings.mlr.press/v180/sharma22a.html>.
- Tom Silver, Rohan Chitnis, Aidan Curtis, Joshua B Tenenbaum, Tomás Lozano-Pérez, and Leslie Pack Kaelbling. Planning with learned object importance in large problem instances using graph neural networks. In *Proceedings of the AAAI conference on artificial intelligence*, volume 35, pages 11962–11971, 2021.
- Simon Ståhlberg, Blai Bonet, and Hector Geffner. Learning general optimal policies with graph neural networks: Expressive power, transparency, and limits. *Proceedings of the 32nd International Conference on Automated Planning and Scheduling*, 2022a.
- Simon Ståhlberg, Blai Bonet, and Hector Geffner. Learning generalized policies without supervision using gnns. *Proceedings of the 19th International Conference on Principles of Knowledge Representation and Reasoning*, 2022b.
- Sam Toyer, Felipe Trevizan, Sylvie Thiébaux, and Lexing Xie. Action schema networks: Generalised policies with deep learning. In *Thirty-Second AAAI Conference on Artificial Intelligence*, 2018.

Petar Veličković, Guillem Cucurull, Arantxa Casanova, Adriana Romero, Pietro Lio, and Yoshua Bengio. Graph attention networks. *International Conference on Learning Representations*, 2018.

Tailin Wu, Hongyu Ren, Pan Li, and Jure Leskovec. Graph information bottleneck. *Advances in Neural Information Processing Systems*, 33:20437–20448, 2020.

Keyulu Xu, Chengtao Li, Yonglong Tian, Tomohiro Sonobe, Ken-ichi Kawarabayashi, and Stefanie Jegelka. Representation learning on graphs with jumping knowledge networks. In Jennifer Dy and Andreas Krause, editors, *Proceedings of the 35th International Conference on Machine Learning*, volume 80 of *Proceedings of Machine Learning Research*, pages 5453–5462. PMLR, 10–15 Jul 2018. URL <https://proceedings.mlr.press/v80/xu18c.html>.

Zhitao Ying, Jiaxuan You, Christopher Morris, Xiang Ren, Will Hamilton, and Jure Leskovec. Hierarchical graph representation learning with differentiable pooling. *Advances in neural information processing systems*, 31, 2018.

Håkan LS Younes, Michael L Littman, David Weissman, and John Asmuth. The first probabilistic track of the international planning competition. *Journal of Artificial Intelligence Research*, 24:851–887, 2005.

Fabio Zambetta and John Thangarajah. Oracle-sage: Planning ahead in graph-based deep reinforcement learning. In *Proceedings of the European Conference on Machine Learning and Principles and Practice of Knowledge Discovery in Databases*, 2022.
